# Supplementary material
Source: PubMed Central journal article supplement (PMC2662252)
Supplement: M802935200_1.pdf [file M802935200_1.pdf]

### **Supplementary Figure Legends**

**Supplementary Figure 1. FBI-1 represses transcription of the *Rb* gene.** (A) RT-PCR and western blot analysis of *Rb* gene repression by FBI-1 at mRNA and protein levels in stable HeLa cells overexpressing FBI-1 or  $\beta$ -galactosidase. GAPDH, control for RT-PCR and western blot analysis. (B) Western blot analysis of RNA interference of endogenous FBI-1 mRNA and protein expression. Knock-down of FBI-1 mRNA by siRNA increased *Rb* gene expression both at the mRNA and protein levels in HEK293A cells.

**Supplementary Figure 2. ChIP assays. FBI-1 and Sp1 compete with each other for binding to FRE3 and GC-box 2 *in vivo*.** (A) ChIP assays on the endogenous *Rb* gene promoter. Human HEK293A cells were transfected with increasing amount of Flag-FBI-1 expression vector (1, 2, 4  $\mu$ g) and analyzed for Sp1 and FBI-1 binding using the antibodies indicated. Sp1 and FBI-1 compete with each other both on the distal and proximal promoter regions. (B) ChIP assays of binding competition between Sp1 and FBI-1 for the distal (bp -370 to -147) and proximal promoter (bp, -131 to +93) elements (probably FRE3 and GC-box 2) in *Drosophila* SL2 cells. SL2 cells were co-transfected with pGL2-*Rb*-Luc reporter plasmid, pPac-Sp1 (1  $\mu$ g), and increasing amounts of pPac-FBI-1 (1, 2, 4  $\mu$ g) and analyzed for promoter binding by ChIP. (C) ChIP assays on the endogenous *Rb* gene promoter after knock-down of endogenous FBI-1 expression in HEK293A cells. Knock-down of FBI-1 resulted in an increase in Sp1 binding to the endogenous *Rb* gene promoter, both on the proximal and distal promoters.

**Supplementary Figure 3. Mouse C2C12 myoblast differentiation, and *Rb* and FBI-1 expression.** (A) Differentiation of control mouse C2C12 myoblasts by 2% horse serum treatment. Pictures of the cells were taken at day 0-4 days after treatment with 2% horse serum differentiation medium. Differentiation into myotubes was observed at day 3, and 4. (B) Western blot analysis of the C2C12 cell lysates using the antibodies indicated. *Rb* expression was gradually increased in control cells with concomitant decrease in FBI-1 (LRF). LRF is a mouse homologue of human FBI-1. Cell extracts (40  $\mu$ g) were analyzed by western blot analysis. GAPDH control; *Rb*, retinoblastoma protein.

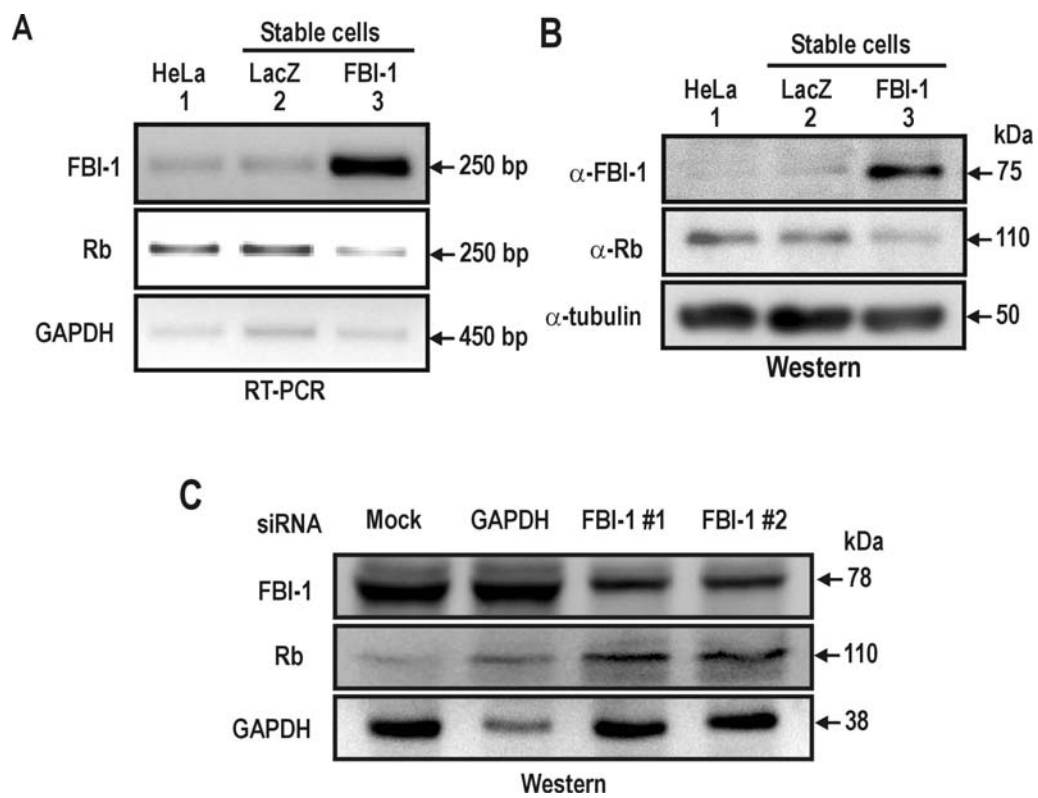

Supplementary Figure 1. Jeon BN et al. 2008

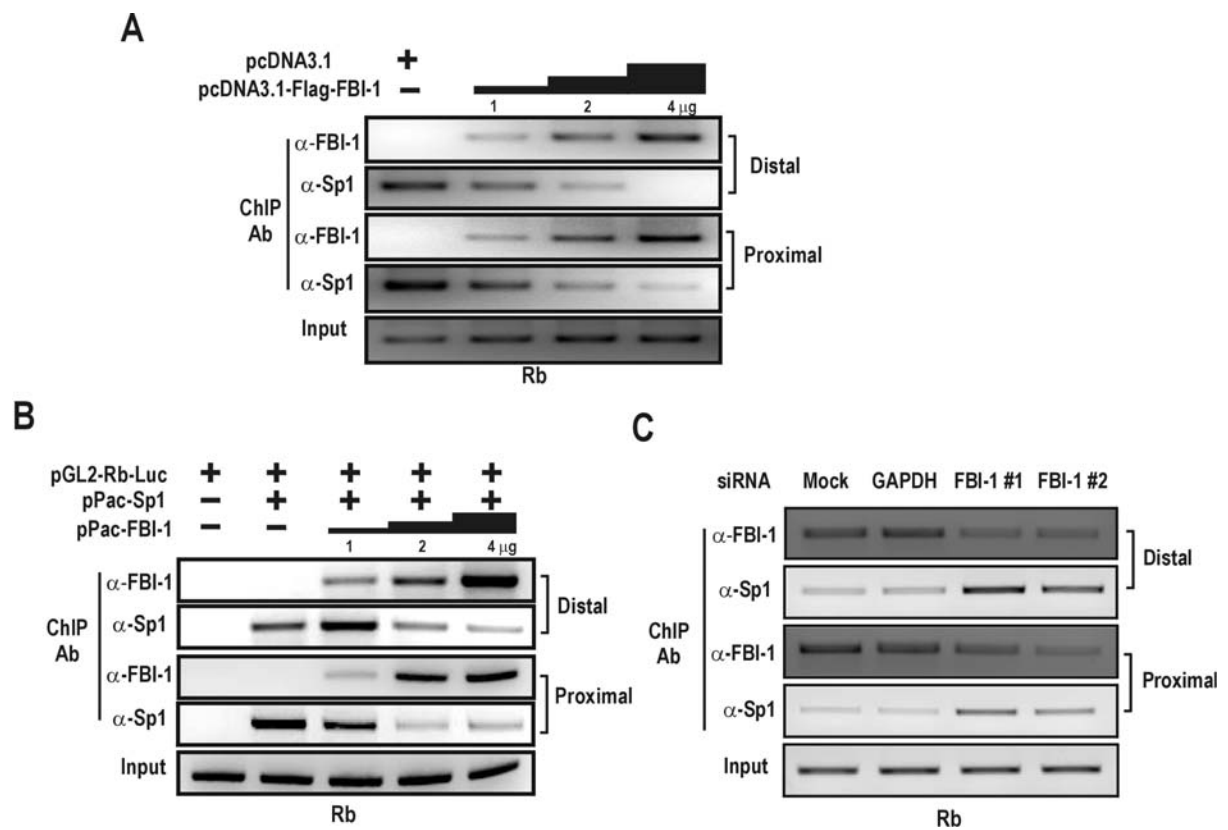

Supplementary Figure 2. Jeon BN et al. 2008

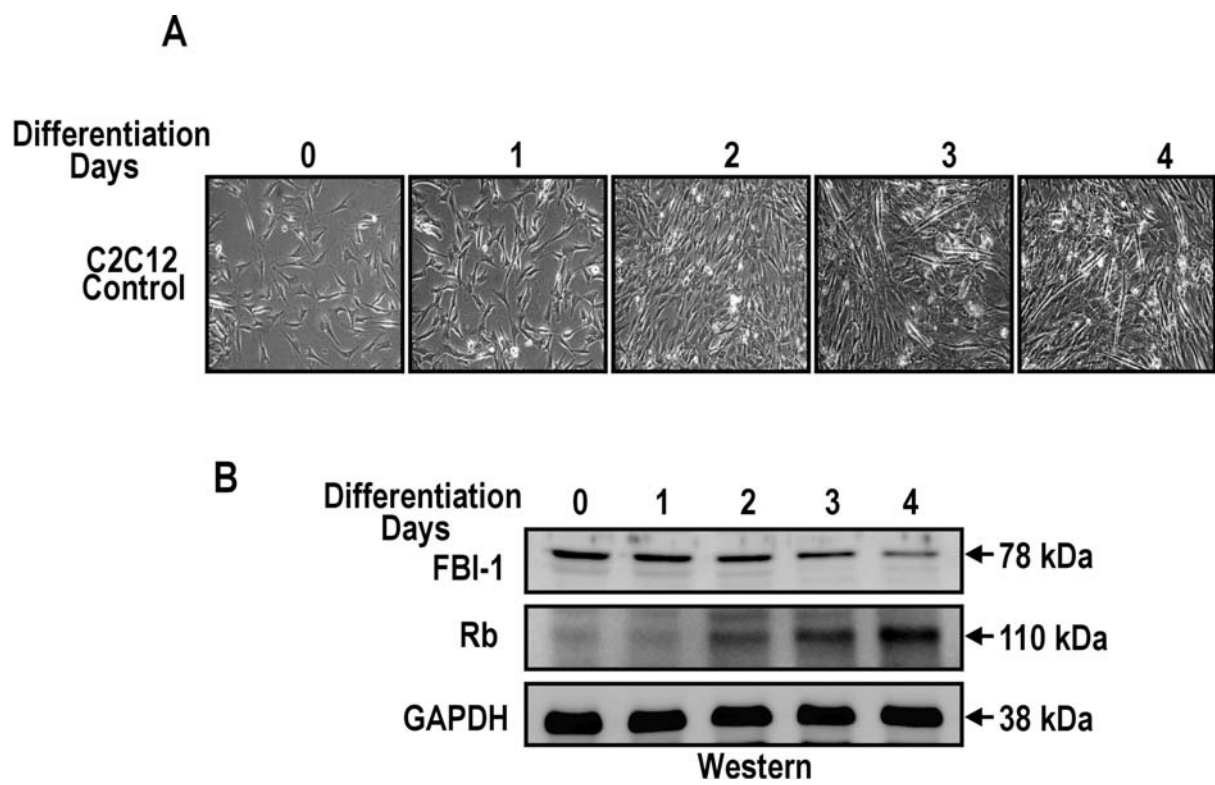

Supplementary Figure 3. Jeon BN et al. 2008
